# Supplementary material for: Genetically predicted C-reactive protein mediates the association between rheumatoid arthritis and atlantoaxial subluxation
Source: Frontiers journal article supplement (doi:10.3389/fendo.2022.1054206), 2022-12-16
Supplement: Data_Sheet_1.XLS [file Data_Sheet_1.XLS]

## Sheet: Supplementary Table S1
Supplementary Table S1: Details of each rheumatoid arthritis cohort of European ancestry in the GWAS meta-analysis
Cohort	Geographical origin	Cases	Controls	RA case seropositivity
BRASS	North America	483	1631	100% CCP+
CANADA	Canada	589	1554	100% CCP+
EIRA	Sweden	1097	1044	100% CCP+
NARAC1	North America	863	1191	100% CCP+
NARAC2	North America	896	6603	100% CCP+
RACI-UK	United Kingdom	1645	6082	100% CCP+
RACI-US	North America	997	2132	100% CCP+
RACI-SE-E	Sweden	740	1117	100% CCP+
RACI-SE-U	Sweden	522	962	100% CCP+
RACI-NL	Netherland	303	2001	100% CCP+
RACI-ES	Spain	397	399	100% CCP+
RACI-i2b2	North America	882	1863	100% CCP+
ReAct	France	275	804	70% CCP+ or RF+
WTCCC	United Kingdom	1520	10507	100% CCP+ or RF+
Dutch (AMC, BeSt LUMC, DREAM)	Netherland	1172	1684	80% CCP+ or RF+
ACR-REF (BRAGGSS, BRAGGSS2, ERA, KI, TEAR)	North America & Europe	347	264	85% CCP+ or RF+
CORRONA	North America	894	1838	61% CCP+ or RF+, 32% unknown
Vanderbilt	North America	739	2247	31% CCP+ or RF+, 56% unknown

## Sheet: Supplementary Table S2
Supplementary Table S2: Details of each C-reactive protein level cohort of European ancestry in the GWAS meta-analysis
Study	N	Age (years) - Mean (SD)	Male (%)	CRP (mg/L) - Mean (SD)	Assay Type
AGES	3218	76.4 (5.5)	42	3.7 (6.3)	Particle-enhanced immunoturbidimetric assay, Roche Diagnostics, Mannheim
ALSPAC	4099	9.9 (0.3)	50	0.7 (2.1)	Immunotubidimetric assay (Tin.a.-quant CRPHS immunotubidimetric assay)
Amish	840	43.7 (14.0)	54	2.1 (4.9)	Nephelometry
ARIC	7396	63.1 (5.6)	47	4.2 (6.3)	Immunoturbidimetric CRP-Latex (II) high-sensitivity assay from Denka Seiken (Tokyo, Japan)
ASPS	580	63.8 (7.9)	46	3.2 (4.3)	Particle-enhanced immunoturbidimetric assay (Tin.a.-quant CRP latex ultrasensitive assay, Roche Diagnostic)
B58C	6092	45.2 (0.4)	50	2.1 (3.9)	High-sensitivity nephelometric assay using latex particles coated with monoclon.a.l antibodies to human CRP in the BN Prospec protein analyser (Dade Behring, Marburg, Germany)
BHS EA	479	36.6 (4.2)	44	2.8 (3.3)	Latex particle-enhanced immunoturbidimetric assay
Busselton Health Study	1259	53.9 (17.2)	43	3.1 (4.6)	Tin.a.-quant CRP latex enhanced immunoturbidimetric assay
BLSA	477	70.0 (14.1)		2.5 (3.9)	BNII nephelometer Siemmens utilizing a particle enhanced immunonepholometric assay
CARDIA	1558	35.5 (3.4)	48	2.4 (4.5)	BNII immunonephelometry (BNII Nephelometer 100 An.a.lyzer [Dade Behring]
CHAP	543	81.1 (6.6)	40	4.0 (6.7)	Immunopholometric assay (BMI nephelometer from Dade Behring utilizing a particle enhanced immunopholometric assay)
CHS	3265	72.3 (5.4)	39	4.1 (7.5)	ELISA
CILENTO	1142	51.4 (19.3)	45	3.0 (4.7)	Immunoturbidimetric assay on a Cobas Integra 800 an.a.lyzer (Roche Diagnostics, Mannheim, Germany
CoLaus	5409	53.2 (10.7)	48	2.4 (3.4)	Immunoassay and latex HS (Immulite 1000-High, Diagnostic Products Corporation, LA, CA, USA)
Corogene	2144	66.3 (11.7)	71	16.1 (30.1)	Photometric, immunochemical
CROATIA Vis	853	56.4 (15.5)	42	2.3 (3.0)	High sensitivity enzyme-linked immunosorbent assay (ELISA) kit. R&D systems
DESIR	716	54.4 (8.9)	25	1.9 (3.1)	Nephelometry, (BNII nephelometer from Behring, Rueil Malmaison, France)
DNBC-PTB	1792	29.6 (4.2)	0	4.5 (6.6)	Particle enhanced immuno-turbidimetric assay (Cardiac C-Reactive Protein (Latex) High Sensitive, Roche Cobas c 111 analyzer )
EPIC	1836	59.7 (8.8)	47	3.1 (5.3)	Heterogeneous Immunoassay , C Reactive Protein (CRP) OlympusUk Ltd (HERTS, UK) reagent product no. OSR6199
FamHS	2700	57.5 (13.3)	45	3.5 (5.4)	BNII nephelometer from Dade Behring utilizing a particle enhanced immunonepholometric assay. Polystyrene particles were coated with monoclon.a.l antibodies to hCRP
Fenland	1385	44.9 (7.3)	44	3.1 (6.5)	Siemens Dimension® RxL an.a.lyser, Siemens Dimension® CCRP (CardioPhase® high sensitivity CRP) kit, product RF434
FHS	6895	49.4 (13.8)	47	3.3 (5.7)	Particle enhanced immunonephelometry on a BN Prospec protein an.a.lyzer (Dade Behring, Marburg, Germany)
Finrisk	1880	55.5 (12.2)	54	2.5 (5.0)	Chemiluminescent immunometric assay
GABC	936	21.2 (3.8)	39	1.7 (2.7)	High sensitivity enzyme-linked immunosorbent assay (ELISA)
GARP	351	60.4 (7.5)	19	3.7 (5.5)	Ultrasensitive immunonephelometry method
Genestar	1551	45.5 (12.4)	45	2.5 (2.9)	High sensitivity enzyme-linked immunosorbent assay (ELISA)
GINILISA	883	10.2 (0.2)	54	0.7 (1.8)	Tina-quant C-reactive protein (latex) high sensitive assay; Roche Diagnostics (Mannheim,Germany)
GOLDN	821	48.8 (15.9)	50	2.5 (4.7)	latex particle enhanced immunoturbidimetric (Kamiya)
GOOD	915	18.9 (0.6)	100	1.1 (2.0)	Konelab 20 Clinical Chemistry Autoan.a.lyzer
HABC	1653	73.8 (2.8)	53	2.5 (3.4)	Sandwich enzyme immunoassay kits, Biocheck, Burlingame, CA
HBCS	1716	61.5 (2.9)	43	3.7 (6.1)	Immunoturbidimetric
HCS	2080	66.3 (7.5)	50	3.5 (4.5)	Immunonephelometry.;CRP Flex System on Dimension Vista System, Siemens Healthcare Diagnostics, Newark, DE 19714, USA.
InCHIANTI	1189	68.2 (15.5)	44	4.4 (5.5)	ELISA
INCIPE1	848	61.2 (11.5)	46	3.3 (5.3)	Nephelometry, CRPH High sensitivity C-Reactive protein - Beckman Coulter USA (REF 474630)
KORA F3	1587	52.4 (10.1)	50	2.5 (4.7)	High-sensitivity immunonephelometric assay on a BNII an.a.lyzer (Dade Behring, Marburg, Germany)
KORA F4	1810	60.9 (8.9)	49	2.4 (3.8)	High-sensitivity immunonephelometric assay on a BNII an.a.lyzer (Dade Behring, Marburg, Germany)
KORCULA	864	56.3 (13.8)	37	3.2 (3.0)	High sensitivity CRP ELISA kit. R&D systems
LBC1921	176	86.6 (0.4)	50	3.7 (8.3)	High-sensitivity ELISA kits (R&D Systems, Oxon, UK)
LBC1936	992	69.6 (0.8)	46	5.2 (6.7)	Dry slide immuno-rate method on the OrthoFusion 5.1 F.S analyzers
LifeLines	12838	51.1 (10.8)	42	2.7 (4.8)	Immuno-turbidimetric (CRPL3,Roche Modular P, Mannheim, Germany)
LLS	1902	59.2 (6.6)	46	2.5 (4.6)	ELISA, Hitachi Modular P 800 from Roche, Almere, the Netherlands
LOLIPOP_EW610	920	56.0 (9.8)	73	3.7 (6.9)	Turbidimetric immunoassay (COBAS MIRA, Roche Diagnostics GMbH)
LOLIPOP_EWA	582	54.4 (10.4)	87	4.7 (8.3)	Turbidimetric immunoassay (COBAS MIRA, Roche Diagnostics GMbH)
LOLIPOP_EWP	641	55.7 (9.1)	100	4.8 (14.2)	Turbidimetric immunoassay (COBAS MIRA, Roche Diagnostics GMbH)
LOLIPOP_IA300	2106	48.3 (10.5)		3.4 (5.3)	automated microparticle-enhanced turbidometric immunoassay
LOLIPOP_IA_P	609	51.1 (8.3)		3.8 (5.4)	automated microparticle-enhanced turbidometric immunoassay
LOLIPOP_IA610_control	4030	53.0 (10.3)		3.6 (5.2)	automated microparticle-enhanced turbidometric immunoassay
LOLIPOP_IA610_case	1720	57.7 (9.2)		4.1 (8.0)	automated microparticle-enhanced turbidometric immunoassay
LURIC cases	2360	63.9 (9.8)	75	10.1 (19.8)	ELISA, High Sensitivity C-Reactive Protein (hsCRP), Siemens Healthcare Diagnostics
LURIC controls	619	58.2 (12.3)	52	5.3 (9.5)	ELISA, High Sensitivity C-Reactive Protein (hsCRP), Siemens Healthcare Diagnostics
MESA	2516	62.7 (10.2)	48	3.4 (5.2)	BNII nephelometer (N High Sensitivity CRP; Dade Behring Inc., Deerfield, IL)
MICROS	1222	45.8 (16.4)	44	3.1 (4.7)	Latex-Enhanced Immunoturbidimetry
MrOS Sweden	954	75.3 (3.2)	100	4.4 (7.4)	Konelab 20 Clinical Chemistry Autoan.a.lyzer
NESDA	1909	41.9 (12.5)	32	2.8 (5.0)	ELISA ((Dako, Glostrup, Denmark).
NFBC66	5294	31.2 (0.4)	48	2.1 (3.8)	Immunoenzymometric assay (Medix Biochemica)
NTR	5810	44.8 (15.4)	40	3.6 (7.8)	Immulite 1000 CRP assay (Diagnostic Product Corporation, USA)
OGP-talana	686	46.0 (22.2)	43	3.2 (7.3)	High Sensitivity C-Reactive Protein (hsC) Assay (IMMULITE® 2000 Systems, Siemens Healthcare Diagnostics Products, Llanberis, UK)
ORCADES	879	53.5 (15.8)	45	2.6 (5.1)	High sensitivity CRP ELISA kit. R&D systems
OZALC	8403	46.8 (12.6)	41	3.7 (7.0)	Immuno-turbidimetric, latex particles (Hitachi 917 or Roche Modular P)
PARC	1499	59.6 (13.8)	66	1.0 (1.7)	Latex-enhanced immunoassay (Latex) for hs-CRP measurement on the BN II nephelometer (Dade Behring, Newark, DE)
PIVUS	943	70.2 (0.2)	50	3.2 (4.9)	Immunoturbidimetric assay (Orion Diagnostica, Espoo, Finland)
Prevend	3457	46.6 (12.5)	51	2.8 (5.1)	Nephelometer
PROCARDIS cases	4282	62.3 (7.1)	100	4.2 (8.4)	Immunonephelometric, Dade Behring cardio Phase hsCRP reagent part number OQIY21
PROCARDIS controls	1543	57.0 (9.0)	68	1.73 (1.8)	Immunonephelometric, Dade Behring cardio Phase hsCRP reagent part number OQIY21
PROSPER	5155	75.3 (3.4)	18	6.0 (11.4)	Immunoturbidimetric assay (cobas®, Roche Diagnostics, Mannheim, Germany)
Raine	779	14.0 (0.2)	51	1.3 (2.6)	Immunochemical reaction using Siemens reagent (Siemens Healthcare Diagnostics Inc. Newark, DE 19714 USA)
RS1	5558	69.4 (9.1)	41	3.4 (6.8)	Rate Near Infrared Particle Immunoassay, "Immage® Immunochemistry System, Beckman Coulter, USA"
Sardinia	4069	44.0 (17.2)	44	2.0 (2.0)	Immuno-turbidimetric (hsCRP, Biosystems,Spain)
SHIP	4080	49.7 (16.3)	49	2.8 (4.6)	BN II analyzer (Dade Behring, Marburg, Germany)
TRAILS	1112	16.2 (0.7)	48	1.5 (3.8)	Immunoephelometric assay (CardioPhaseÒ hsCRP, Siemens, Germany)
TWINGENE	9121	65.2 (8.1)	47	3.2 (5.4)	Immunoturbidimetric method (Synchron LX)
Twins UK	4576	51.7 (13.6)	8	3.3 (5.7)	Human Cardiovascular Disease (CVD) Panel 2 (acute-phase proteins) LINCOplex Kit (HCVD2-67BK) from Linco (Millipore) and with the Extracellular Protein Buffer Reagent Kit (LHB0001) from Invitrogen
ULSAM	1085	71.0 (0.6)	100	3.3 (4.7)	Latex enhanced reagent (Dade Behring, Deerfield, IL)
VISP	1515	67.9 (10.7)	65	9.7 (8.4)
WGHS	23186	54.7 (7.1)	0	3.6 (5.6)	Immunoturbidimetric assay (Denka Seiken)
WHI cases	666	67.5 (6.6)	0	4.7 (7.1)	Dade Behring N Latex High Sensitivity hsCRP mono assay
WHI controls	579	67.1 (6.5)	0	3.7 (6.4)	Dade Behring N Latex High Sensitivity hsCRP mono assay
YFS	2023	37.7 (5.0)	45	1.8 (3.3)	Latex -turbidimetric immunoassay, CRP-Latex, Olympus, Ireland, OSR6x99

## Sheet: Supplementary Table S3
Supplementary Table S3: Characteristics of significant SNPs with genome-wide associations (P<5×10-8) for RA on AAS
SNPs	CHR	POS	EA	OA	EAF	BETA	SE	P	SAMPLESIZE	F-STATISTICS
rs12126142	1	154425456	A	G	0.2969	-0.0751	0.0116	1.01e-10	58284	41.9145
rs3761959	1	157669278	T	C	0.3069	0.0744	0.0115	9.64e-11	58284	41.8553
rs61828284	1	173299743	T	C	0.0386	-0.2018	0.0348	6.33e-09	58284	33.6267
rs2258734	1	2483961	A	G	0.2989	-0.0921	0.0123	6.04e-14	58284	56.0672
rs28411352	1	38278579	T	C	0.1803	0.0914	0.0136	1.66e-11	58284	45.1663
rs2301888	1	17672730	A	G	0.3847	-0.1282	0.0121	3.75e-26	58284	112.255
rs6679677	1	114303808	A	C	0.0563	0.591	0.023	1.41e-145	58284	660.267
rs1234313	1	173166247	G	A	0.6075	0.0797	0.0133	1.9e-09	58284	35.9098
rs2076616	1	17412501	G	A	0.6098	-0.0885	0.0135	6.2e-11	58284	42.9753
rs10911902	1	186632317	T	C	0.1246	-0.0847	0.0152	2.36e-08	58284	31.0513
&rs28421442	2	74219615	A	T	0.1569	-0.1234	0.0214	7.86e-09	58284	33.2509
rs12466919	2	61092858	T	C	0.1733	0.1025	0.0152	1.59e-11	58284	45.4737
rs11123811	2	100760172	C	T	0.6512	-0.0995	0.0114	2.01e-18	58284	76.1792
rs11889341	2	191943742	T	C	0.2112	0.1466	0.0129	4.32e-30	58284	129.148
&rs1858037	2	65598300	A	T	0.4074	-0.1012	0.0131	1.14e-14	58284	59.6786
rs1355208	2	30445322	G	A	0.6377	0.0818	0.0119	6.77e-12	58284	47.2512
rs3087243	2	204738919	A	G	0.226	-0.1261	0.0124	3.32e-24	58284	103.416
rs3806624	3	27764623	G	A	0.7654	0.0863	0.0131	3.94e-11	58284	43.3989
rs4602367	3	17053499	G	A	0.6972	0.075	0.0117	1.76e-10	58284	41.0914
rs13103285	4	10726520	T	C	0.4018	0.0989	0.0131	4.29e-14	58284	56.9967
rs34046593	4	26111593	A	G	0.1573	0.1422	0.017	7.17e-17	58284	69.9683
rs403214	5	102603701	G	A	0.5533	-0.0914	0.0146	3.96e-10	58284	39.191
rs2918392	5	10704797	C	T	0.6939	0.0668	0.0122	4.62e-08	58284	29.9801
rs7731626	5	55444683	A	G	0.1669	-0.1956	0.0184	1.94e-26	58284	113.006
rs244685	5	133423890	G	T	0.7884	-0.089	0.0144	6.04e-10	58284	38.1993
&rs3025669	6	29506431	G	C	0.1605	-0.2534	0.0222	2.91e-30	58284	130.289
*rs9258357	6	29751129	C	T	0.8345	0.1874	0.0194	5.77e-22	58284	93.3116
rs115521560	6	32019382	C	A	0.5239	0.7878	0.0364	1.29e-103	58284	468.413
rs9271365	6	32586794	G	T	0.5857	0.4888	0.0128	1e-200	58284	1458.29
rs62422878	6	106676470	T	C	0.0879	0.1037	0.0176	3.57e-09	58284	34.7162
rs12530098	6	14107197	T	C	0.1223	0.1382	0.0204	1.35e-11	58284	45.894
rs1611236	6	29748690	A	G	0.212	-0.1165	0.0131	4.54e-19	58284	79.0878
rs71565312	6	32179319	A	G	0.0146	0.699	0.0402	1.11e-67	58284	302.345
rs212389	6	159489791	A	G	0.4297	0.1058	0.0147	6.66e-13	58284	51.8008
rs112733823	6	30775277	T	C	0.0668	0.191	0.0188	3.82e-24	58284	103.217
rs139395255	6	31449736	G	A	0.1839	0.3833	0.0235	8.68e-60	58284	266.037
rs114508013	6	31868765	A	G	0.0149	0.488	0.0441	1.82e-28	58284	122.451
rs5020946	6	32450089	T	G	0.4122	0.6519	0.0169	1e-200	58284	1487.95
&rs41316148	6	31976752	C	T	0.4004	-0.6134	0.0876	2.47e-12	58284	49.032
rs2233424	6	44233921	T	C	0.1933	0.1964	0.0187	6.49e-26	58284	110.306
rs7749323	6	138230389	A	G	0.0461	0.2835	0.0253	3.47e-29	58284	125.564
rs9405192	6	382537	A	G	0.3995	-0.089	0.0137	9.26e-11	58284	42.2026
rs11754264	6	29931663	C	T	0.2742	-0.1359	0.0193	1.88e-12	58284	49.582
rs146305655	6	32268953	A	G	0.0141	-0.4379	0.0452	3.29e-22	58284	93.8584
rs76153210	6	44284508	T	C	0.2047	0.1597	0.0205	6.83e-15	58284	60.6879
rs1571878	6	167540842	T	C	0.3952	-0.1539	0.0116	4.13e-40	58284	176.02
rs117026326	7	74126034	T	C	0.1113	0.381	0.0424	2.45e-19	58284	80.7455
rs42034	7	92239144	G	A	0.465	0.0871	0.0153	1.28e-08	58284	32.4081
rs740122	7	28166442	A	G	0.4193	-0.0782	0.0134	5.37e-09	58284	34.0568
rs4717901	7	74016979	C	A	0.1939	0.249	0.0349	9.52e-13	58284	50.9035
rs3757387	7	128576086	C	T	0.5585	0.1236	0.0137	1.87e-19	58284	81.3946
rs9693589	8	11348961	A	G	0.4006	0.1127	0.0128	1.5e-18	58284	77.5225
rs10435844	9	123668199	T	G	0.4942	-0.0784	0.0121	9.73e-11	58284	41.9818
rs11574914	9	34710338	A	G	0.1513	0.1153	0.0149	9.92e-15	58284	59.8806
rs3134883	10	6100725	A	G	0.2065	0.0991	0.0125	1.98e-15	58284	62.8532
rs502919	10	6517167	C	T	0.4349	0.0829	0.0134	6.17e-10	58284	38.2736
rs7097397	10	50025396	A	G	0.4	-0.0847	0.012	1.42e-12	58284	49.8201
rs71508903	10	63779871	T	C	0.1689	0.1487	0.0143	3.13e-25	58284	108.131
rs2275806	10	8095340	A	G	0.4361	-0.0725	0.0122	2.51e-09	58284	35.3148
rs1538981	10	31411355	T	C	0.3568	0.0671	0.0114	4.42e-09	58284	34.6446
&rs6479800	10	64036881	C	G	0.4059	0.1202	0.0181	3.01e-11	58284	44.1013
*rs2156698	11	128494441	A	G	0.3079	-0.0797	0.0128	4.64e-10	58284	38.7701
rs6421571	11	118743772	C	T	0.8967	0.134	0.0178	5.57e-14	58284	56.6721
rs9943599	11	9752741	T	C	0.3545	0.083	0.0131	2.7e-10	58284	40.1433
rs34502849	11	72411787	A	G	0.2473	-0.0851	0.014	1.07e-09	58284	36.949
rs4409785	11	95311422	C	T	0.4338	0.0982	0.017	7.85e-09	58284	33.3676
rs660442	11	64042997	A	G	0.0936	-0.1067	0.0175	1.11e-09	58284	37.1752
rs4963581	12	24813281	A	G	0.5109	0.0856	0.0156	3.75e-08	58284	30.1091
&rs4622308	12	56469185	T	C	0.4615	0.0878	0.0125	2.21e-12	58284	49.3366
rs9532434	13	40355913	C	T	0.7956	0.114	0.0126	1.94e-19	58284	81.8594
&rs1595260	14	69267695	T	A	0.7851	0.0845	0.0126	2.29e-11	58284	44.9751
rs1950897	14	68760141	T	C	0.5178	0.1069	0.0144	1.02e-13	58284	55.11
*rs2582531	14	105388182	C	A	0.6245	0.1617	0.0179	1.71e-19	58284	81.6045
rs7170107	15	70010647	T	C	0.1214	0.1366	0.0158	6.11e-18	58284	74.7459
rs8032939	15	38834033	C	T	0.6126	0.1244	0.0123	4.47e-24	58284	102.289
rs12918327	16	30626616	T	C	0.1118	0.0867	0.0157	3.04e-08	58284	30.4957
rs7206670	16	11833886	T	G	0.3852	0.0701	0.0119	4.14e-09	58284	34.701
&rs9927316	16	86016401	G	C	0.2837	0.0906	0.0136	2.3e-11	58284	44.3791
rs4795400	17	38067020	T	C	0.2452	0.0743	0.012	5.86e-10	58284	38.3367
rs2847297	18	12797694	G	A	0.5197	0.0903	0.0119	2.65e-14	58284	57.5813
&rs34536443	19	10463118	C	G	0.5217	-0.3801	0.0474	1.08e-15	58284	64.3042
rs6011186	20	62484008	T	C	0.3342	-0.1074	0.0171	3.19e-10	58284	39.4472
rs1883832	20	44746982	C	T	0.7483	0.1052	0.0127	1.13e-16	58284	68.6158
&rs7278257	21	45653764	C	G	0.4578	-0.0894	0.0143	4.28e-10	58284	39.0844
rs1893592	21	43855067	C	A	0.4611	-0.0976	0.0132	1.48e-13	58284	54.6703
rs2073609	21	45707976	C	T	0.3599	0.1029	0.0182	1.47e-08	58284	31.966
rs8126756	21	34775444	C	T	0.5461	-0.0823	0.0137	1.81e-09	58284	36.0876
rs2069235	22	39747780	A	G	0.3771	0.1296	0.014	1.69e-20	58284	85.6947
*rs2256609	22	21916361	A	G	0.2317	0.0891	0.0139	1.36e-10	58284	41.089
rs5912815	23	78466147	G	T	0.5853	-0.0787	0.0134	4.79e-09	58284	34.4937
& represent palindromic SNPs, which were not used as instrumental variables in Mendelian randomization analysis. rs3129184 was used as a proxy for *rs9258357 in the outcome. rs5754104 was used as a proxy for *rs2256609 in the outcome. rs2841275 was used as a proxy for *rs2582531 in the outcome. rs7105899 was used as a proxy for *rs2156698 in the outcome. CHR, chromosome; POS, position; EA, effect…

## Sheet: Supplementary Table S4
Supplementary Table S4: Characteristics of SNPs with P<5×10-6 for AAS on RA
SNPs	CHR	POS	EA	OA	EAF	BETA	SE	P	SAMPLESIZE	F-STATISTICS
rs75398064	2	225673053	T	C	0.07178	1.5871	0.3407	3.19301e-06	227529	21.7002
rs11680159	2	80120609	G	A	0.2484	0.9241	0.1888	9.82902e-07	227529	23.9571
rs13146757	4	91121751	T	C	0.01155	5.2529	1.0476	5.32697e-07	227529	25.1424
#rs117880837	7	24638186	G	A	0.01658	3.9312	0.8332	2.37898e-06	227529	22.2614
rs28512455	22	49007057	G	A	0.3862	0.7516	0.1623	3.65199e-06	227529	21.4455
#rs117880837 have no proxy SNP and does not participate in MR analysis as IVs. CHR, chromosome; POS, position; EA, effect allele; OA, other allele; EAF, effect allele frequency.

## Sheet: Supplementary Table S5
Supplementary Table S5: Characteristics of significant SNPs with genome-wide associations (P<5×10-8) for RA on CRP
SNPs	CHR	POS	EA	OA	EAF	BETA	SE	P	SAMPLESIZE	F-STATISTICS	PROXY_SNP
rs10911902	1	186632317	T	C	0.1246	-0.0847	0.0152	2.36e-08	58284	31.0513
rs1234313	1	173166247	G	A	0.6075	0.0797	0.0133	1.9e-09	58284	35.9098
rs2076616	1	17412501	G	A	0.6098	-0.0885	0.0135	6.2e-11	58284	42.9753
rs2258734	1	2483961	A	G	0.2989	-0.0921	0.0123	6.04e-14	58284	56.0672	rs10752747
rs2301888	1	17672730	A	G	0.3847	-0.1282	0.0121	3.75e-26	58284	112.255
rs3761959	1	157669278	T	C	0.3069	0.0744	0.0115	9.64e-11	58284	41.8553
rs6679677	1	114303808	A	C	0.0563	0.591	0.023	1.41e-145	58284	660.267
#rs12126142	1	154425456	A	G	0.2969	-0.0751	0.0116	1.01e-10	58284	41.9145
rs11123811	2	100760172	C	T	0.6512	-0.0995	0.0114	2.01e-18	58284	76.1792
rs11889341	2	191943742	T	C	0.2112	0.1466	0.0129	4.32e-30	58284	129.148
rs12466919	2	61092858	T	C	0.1733	0.1025	0.0152	1.59e-11	58284	45.4737	rs13019590
rs1355208	2	30445322	G	A	0.6377	0.0818	0.0119	6.77e-12	58284	47.2512
rs3087243	2	204738919	A	G	0.226	-0.1261	0.0124	3.32e-24	58284	103.416
&rs28421442	2	74219615	A	T	0.1569	-0.1234	0.0214	7.86e-09	58284	33.2509
&rs1858037	2	65598300	A	T	0.4074	-0.1012	0.0131	1.14e-14	58284	59.6786
rs3806624	3	27764623	G	A	0.7654	0.0863	0.0131	3.94e-11	58284	43.3989
rs4602367	3	17053499	G	A	0.6972	0.075	0.0117	1.76e-10	58284	41.0914
rs13103285	4	10726520	T	C	0.4018	0.0989	0.0131	4.29e-14	58284	56.9967	rs16872571
rs34046593	4	26111593	A	G	0.1573	0.1422	0.017	7.17e-17	58284	69.9683	rs6825116
rs244685	5	133423890	G	T	0.7884	-0.089	0.0144	6.04e-10	58284	38.1993
rs12530098	6	14107197	T	C	0.1223	0.1382	0.0204	1.35e-11	58284	45.894
rs1571878	6	167540842	T	C	0.3952	-0.1539	0.0116	4.13e-40	58284	176.02
rs9258357	6	29751129	C	T	0.8345	0.1874	0.0194	5.77e-22	58284	93.3116	rs1633036
rs212389	6	159489791	A	G	0.4297	0.1058	0.0147	6.66e-13	58284	51.8008
rs2233424	6	44233921	T	C	0.1933	0.1964	0.0187	6.49e-26	58284	110.306	rs2236500
rs5020946	6	32450089	T	G	0.4122	0.6519	0.0169	1e-200	58284	1487.95
rs62422878	6	106676470	T	C	0.0879	0.1037	0.0176	3.57e-09	58284	34.7162	rs3804333
rs7749323	6	138230389	A	G	0.0461	0.2835	0.0253	3.47e-29	58284	125.564
&rs3025669	6	29506431	G	C	0.1605	-0.2534	0.0222	2.91e-30	58284	130.289
rs3757387	7	128576086	C	T	0.5585	0.1236	0.0137	1.87e-19	58284	81.3946	rs3807306
rs10435844	9	123668199	T	G	0.4942	-0.0784	0.0121	9.73e-11	58284	41.9818
rs11574914	9	34710338	A	G	0.1513	0.1153	0.0149	9.92e-15	58284	59.8806
rs1538981	10	31411355	T	C	0.3568	0.0671	0.0114	4.42e-09	58284	34.6446
rs2275806	10	8095340	A	G	0.4361	-0.0725	0.0122	2.51e-09	58284	35.3148
rs3134883	10	6100725	A	G	0.2065	0.0991	0.0125	1.98e-15	58284	62.8532
rs502919	10	6517167	C	T	0.4349	0.0829	0.0134	6.17e-10	58284	38.2736
rs7097397	10	50025396	A	G	0.4	-0.0847	0.012	1.42e-12	58284	49.8201
rs71508903	10	63779871	T	C	0.1689	0.1487	0.0143	3.13e-25	58284	108.131	rs11593907
&rs6479800	10	64036881	C	G	0.4059	0.1202	0.0181	3.01e-11	58284	44.1013
rs7105899	11	128494441	A	G	0.3079	-0.0797	0.0128	4.64e-10	58284	38.7701	rs2156698
rs4409785	11	95311422	C	T	0.4338	0.0982	0.017	7.85e-09	58284	33.3676
rs6421571	11	118743772	C	T	0.8967	0.134	0.0178	5.57e-14	58284	56.6721
rs660442	11	64042997	A	G	0.0936	-0.1067	0.0175	1.11e-09	58284	37.1752
rs9943599	11	9752741	T	C	0.3545	0.083	0.0131	2.7e-10	58284	40.1433	rs360158
rs4622308	12	56469185	T	C	0.4615	0.0878	0.0125	2.21e-12	58284	49.3366	rs11171739
‡rs4963581	12	24813281	A	G	0.5109	0.0856	0.0156	3.75e-08	58284	30.1091
rs9532434	13	40355913	C	T	0.7956	0.114	0.0126	1.94e-19	58284	81.8594	rs8002731
rs2841275	14	105388182	C	A	0.6245	0.1617	0.0179	1.71e-19	58284	81.6045	rs11623422
rs1950897	14	68760141	T	C	0.5178	0.1069	0.0144	1.02e-13	58284	55.11	rs911263
&rs1595260	14	69267695	T	A	0.7851	0.0845	0.0126	2.29e-11	58284	44.9751
rs7170107	15	70010647	T	C	0.1214	0.1366	0.0158	6.11e-18	58284	74.7459
rs8032939	15	38834033	C	T	0.6126	0.1244	0.0123	4.47e-24	58284	102.289
rs12918327	16	30626616	T	C	0.1118	0.0867	0.0157	3.04e-08	58284	30.4957	rs7198250
&rs9927316	16	86016401	G	C	0.2837	0.0906	0.0136	2.3e-11	58284	44.3791
rs4795400	17	38067020	T	C	0.2452	0.0743	0.012	5.86e-10	58284	38.3367
rs2847297	18	12797694	G	A	0.5197	0.0903	0.0119	2.65e-14	58284	57.5813
&rs34536443	19	10463118	C	G	0.5217	-0.3801	0.0474	1.08e-15	58284	64.3042
rs6011186	20	62484008	T	C	0.3342	-0.1074	0.0171	3.19e-10	58284	39.4472	rs6062550
rs1893592	21	43855067	C	A	0.4611	-0.0976	0.0132	1.48e-13	58284	54.6703
rs8126756	21	34775444	C	T	0.5461	-0.0823	0.0137	1.81e-09	58284	36.0876	rs9808753
&rs7278257	21	45653764	C	G	0.4578	-0.0894	0.0143	4.28e-10	58284	39.0844
rs5754104	22	21916361	A	G	0.2317	0.0891	0.0139	1.36e-10	58284	41.089	rs131665
‡rs2069235	22	39747780	A	G	0.3771	0.1296	0.014	1.69e-20	58284	85.6947
& represent palindromic SNPs, which were not used as instrumental variables in Mendelian randomization analysis. ‡rs2069235 and ‡rs4963581 are incompatible alleles, which were not used as instrumental variables in Mendelian randomization analysis. The result of the steiger test for #rs12126142 is FALSE, so this SNP is not involved in the Mendelian randomization analysis. CHR, chromosome; POS, pos…

## Sheet: Supplementary Table S6
Supplementary Table S6: Characteristics of significant SNPs with genome-wide associations (P<5×10-8) for CRP on AAS
SNPs	CHR	POS	EA	OA	EAF	BETA	SE	P	SAMPLESIZE	F-STATISTICS
rs1805096	1	66102257	A	G	0.38625	-0.104381	0.003614	2.1677e-183	204402	834.193
rs6672627	1	154346967	A	C	0.146148	-0.037135	0.005083	2.89001e-13	204402	53.3736
rs4129267	1	154426264	T	C	0.385524	-0.087519	0.003612	1.1995e-129	204402	587.096
rs3122633	1	159377458	C	T	0.301705	0.027479	0.00389	1.67996e-12	204402	49.9002
&rs2293476	1	40036847	C	G	0.225941	0.030262	0.004225	8.2699e-13	204402	51.3029
rs4655802	1	65888231	A	G	0.614793	-0.025012	0.00416	1.88001e-09	204402	36.1502
rs469772	1	91530305	T	C	0.193541	-0.031327	0.004542	5.53988e-12	204402	47.5711
rs4656849	1	159723521	G	A	0.621343	0.057656	0.003723	4.91021e-54	204402	239.83
rs10925027	1	247612562	C	T	0.599644	-0.036035	0.00382	4.25011e-21	204402	88.9861
rs9284725	2	102744854	A	C	0.761212	-0.02731	0.00419	7.34007e-11	204402	42.483
rs1260326	2	27730940	C	T	0.607156	-0.073462	0.003604	2.72019e-92	204402	415.486
rs1509394	2	28647084	T	C	0.542959	0.025685	0.004147	6.05006e-10	204402	38.3611
rs13409371	2	113838145	A	G	0.429854	0.048232	0.003847	5.06991e-36	204402	157.19
rs12995480	2	629881	C	T	0.830925	0.031261	0.004855	1.24e-10	204402	41.4598
rs4246598	2	88438050	A	C	0.46258	0.022063	0.003547	5.10999e-10	204402	38.6907
rs1441169	2	214033530	G	A	0.532568	-0.024926	0.003725	2.26986e-11	204402	44.7768
rs2352975	3	49891885	C	T	0.303573	0.024897	0.004026	6.42999e-10	204402	38.2425
rs17658229	5	172191052	C	T	0.045881	0.055568	0.009522	5.49997e-09	204402	34.056
rs9271608	6	32591588	G	A	0.215335	0.042021	0.004954	2.33024e-17	204402	71.9483
rs12202641	6	116314634	T	C	0.39442	-0.022804	0.003617	2.99999e-10	204402	39.7489
rs1490384	6	126851160	T	C	0.512283	-0.024816	0.003545	2.64972e-12	204402	49.0039
rs3134899	6	31473286	T	C	0.767055	0.023329	0.004274	4.93003e-08	204402	29.7936
rs13233571	7	72971231	T	C	0.119609	-0.056895	0.005476	2.94985e-25	204402	107.95
rs1880241	7	22759469	G	A	0.48295	-0.027537	0.003687	8.41008e-14	204402	55.7811
rs2710804	7	36084529	C	T	0.367409	0.021262	0.003737	1.29999e-08	204402	32.3714
&rs10240168	7	22819334	G	C	0.221389	-0.028684	0.004343	4.1096e-11	204402	43.6214
rs2891677	8	126344208	T	C	0.538958	0.019859	0.003511	1.59001e-08	204402	31.9929
rs6601302	8	9239458	G	T	0.736931	-0.030518	0.004478	9.79941e-12	204402	46.4455
rs2064009	8	117007850	T	C	0.581445	0.027111	0.003549	2.27982e-14	204402	58.3551
rs4841132	8	9183596	G	A	0.909023	0.065095	0.006243	1.99986e-25	204402	108.72
*rs644234	9	136142217	G	T	0.369203	0.022597	0.003708	1.13e-09	204402	37.1383
rs1051338	10	91007360	G	T	0.308119	0.023881	0.003992	2.27002e-09	204402	35.7869
rs1582763	11	60021948	A	G	0.37181	-0.022107	0.0037	2.37001e-09	204402	35.699
rs7121935	11	72496148	A	G	0.376337	-0.021853	0.00374	5.27995e-09	204402	34.1412
&rs6485751	11	47336442	C	G	0.218471	-0.03089	0.004359	1.42988e-12	204402	50.2183
rs10832027	11	13357183	A	G	0.668809	0.025944	0.003745	4.42996e-12	204402	47.9922
&rs11108056	12	95855385	G	C	0.42371	-0.027907	0.003708	5.42001e-14	204402	56.6431
rs4767920	12	121065277	A	G	0.842127	-0.038519	0.0049	4.00037e-15	204402	61.7956
&rs10778215	12	103537266	A	T	0.488517	-0.033242	0.003583	1.85994e-20	204402	86.0757
rs7310409	12	121424861	G	A	0.607808	0.137075	0.003706	1e-200	204402	1368.06
rs2239222	14	73011885	G	A	0.363541	0.035484	0.003901	9.86961e-20	204402	82.7396
rs12587622	14	73365174	A	G	0.500861	-0.020798	0.003609	8.52001e-09	204402	33.21
rs340005	15	60878030	A	G	0.620695	0.030007	0.003736	1.00995e-15	204402	64.5107
rs10521222	16	51158710	T	C	0.04533	-0.104411	0.010714	2.06016e-22	204402	94.9706
&rs1558902	16	53803574	A	T	0.405653	0.033926	0.003701	5.19996e-20	204402	84.0286
rs178810	17	16097430	T	C	0.562924	0.02001	0.003606	2.94999e-08	204402	30.7923
rs10512597	17	72699833	C	T	0.817288	0.036931	0.00489	4.44017e-14	204402	57.038
rs12960928	18	57897803	C	T	0.267003	0.024	0.003993	1.90999e-09	204402	36.1263
rs2852151	18	12841176	A	G	0.404527	0.024735	0.003655	1.35988e-11	204402	45.7983
rs4092465	18	55080437	G	A	0.650698	0.027483	0.004364	3.11e-10	204402	39.6606
rs387976	19	45379060	C	A	0.331946	0.025507	0.003946	1.05e-10	204402	41.7835
rs1800961	20	43042364	T	C	0.033816	-0.1115	0.011267	4.6302e-23	204402	97.9339
rs2315008	20	62343956	G	T	0.687731	0.023467	0.003777	5.36006e-10	204402	38.603
rs2836878	21	40465534	A	G	0.27418	-0.042902	0.004079	7.71081e-26	204402	110.624
rs6001193	22	39074737	G	A	0.35065	-0.027809	0.003706	6.5298e-14	204402	56.3067
& represent palindromic SNPs, which were not used as instrumental variables in Mendelian randomization analysis. rs8176645 was used as a proxy for *rs644234 in the AAS. CHR, chromosome; POS, position; EA, effect allele; OA, other allele; EAF, effect allele frequency.

## Sheet: Supplementary Table S7
Supplementary Table S7: Heterogeneity and pleiotropy in MR analyses.
EXPOSURE	OUTCOME	METHOD	NO. OF SNPs	HETEROGENEITY			HORIZONTAL PLEIOTROPY
				Q	Q DEGREES OF FREEDOM	Q P-VALUE	MR-EGGER REGRESSION			MR-PRESSO
							EGGER INTERCEPT	SE	P-VALUE	GLOBAL TEST P-VALUE
RA	AAS	MR Egger	80	82.132	78	0.35	-0.009	0.02	0.7	0.43
RA	AAS	Inverse variance weighted	80	82.286	79	0.38
RA	CRP	MR Egger	52	41.16	45	0.63	-0.004	0.001	0.0001	0.06
RA	CRP	Inverse variance weighted	52	58.51	46	0.1
CRP	AAS	MR Egger	49	43.83	47	0.6	-0.009	0.03	0.8	0.58
CRP	AAS	Inverse variance weighted	49	43.91	48	0.64
AAS	RA	MR Egger	4	1.85	2	0.4	0.45	0.03	0.2	0.32
AAS	RA	Inverse variance weighted	4	5.21	3	0.16
MR, Mendelian Randomization; MR-PRESSO, MR-Pleiotropy Residual Sum and Outlier method.

## Sheet: Supplementary Figure S1
Supplementary Figure S1:Funnel plots to visualize overall heterogeneity of MR estimates for the effect of RA on AAS.

## Sheet: Supplementary Figure S2
Supplementary Figure S2:Leave-one-out plot to visualize causal effect of RA on AAS risk when leaving one SNP out.
